# Supplementary material for: A head-to-head comparison of the efficacy and safety of ixekizumab and adalimumab in biological-naïve patients with active psoriatic arthritis: 24-week results of a randomised, open-label, blinded-assessor trial
Source: HighWire-hosted journal article supplement (doi:10.1136/annrheumdis-2019-215386), 2019-09-28
Supplement: annrheumdis-2019-215386supp001_data_supplement.pdf [file annrheumdis-2019-215386supp001_data_supplement.pdf]

**ONLINE SUPPLEMENTARY MATERIALS****LIST OF INVESTIGATORS**

Centro Privado de Medicina, Familiar Mindout Research, Ciudad Autonoma de Buenos Aire, Argentina

Leonardo Naftal, MD

Centro Polivalente de Asistencia e Inv. Clinica CER-San Juan, San Juan, Argentina

Rodolfo Ariel Pardo Hidalgo, MD

Hospital General de Agudos "Ramos Mejia," Ciudad Autonoma de Buenos Aire, Argentina

Eduardo Mario Kerzberg, MD

Consultora Integral de Salud S.R.L.-Centro Médico Privado, Cordoba, Argentina

Veronica Gabriela Savio, MD

Instituto de Asist Reumatologica Integral, San Fernando, Buenos Aires, Argentina

Alicia Lazaro, MD

CER Instituto Medico, Quilmes, Buenos Aires, Argentina

Benito Jorge Velasco, MD

CENUDIAB, Ciudad Autonoma de Buenos Aire, Argentina

Norma Beatriz Verzero, MD

Instituto Centenario, Ciudad Autonoma de Buenos Aire, Argentina

Cecilia Adma Asnal, MD

Organizacion Medica de Investigacion – OMI, Ciudad Autonoma de Buenos Aire, Argentina

Eduardo Fabian Mysler, MD

Centro Medico Privado de Reumatologia, Tucuman, Argentina

Alberto Berman, MD

Clinica Adventista de Belgrano, Ciudad de Buenos Aires, Argentina

Federico Javier Ariel, MD

Rheumatology, The Queen Elizabeth Hospital, Woodville South, South Australia, Australia

Maureen Rischmueller, MD

Southern Clinical Research Pty Ltd, Hobart, Australia

Jane Margaret Zochling, MD

Optimus Clinical Research, Kogarah, NSW, Australia

Paul A Bird, MD

Emeritus Research, Camberwell, Victoria, Australia

Stephen Hall, MD

Andrew Ostor, MD

St Vincent's Hospital Melbourne, Fitzroy, VIC, Australia

Evange Romas, MD

AKH, Wien, Wien, Austria

Georg Stummvoll, MD

Klaus Machold, MD

Rheuma-Zentrum Wien Oberlaa, Wien, Wien, Austria

Peter Spellitz, MD

Zentrum für klinische Studien Dr. Ursula Hanusch GmbH, Wien, Wien, Austria

Ursula Hanusch, MD

Saint Joseph Hospital, Gilly, Belgium

Marc Vanden Berghe, MD

Hopital CHU Ambroise Pare, Mons, Belgium

Marc Leon, MD

Reumaclinic, Genk, Belgium

Johan Louis Magda Vanhoof, MD

Universitair Ziekenhuis Gent, Gent, Belgium

Filip Eduard Jeanne Van den Bosch, MD

Universitaire Ziekenhuizen Leuven - Campus Gasthuisberg, Leuven, Belgium

Kurt Leo Francois De Vlam, MD

Centre de Recherche Musculo- Squelettique, Trois-Rivières, Quebec, Canada

Frederic Morin, MD

Groupe de Recherche en Maladies Osseuses Inc., Quebec, Quebec, Canada

Louis Bessette, MD

Skin Centre for Dermatology, Peterborough, Ontario, Canada

Melinda J Gooderham, MD

The Waterside Clinic, Barrie, Ontario, Canada

Derek A Haaland, MD

Aalborg Universitetshospital – Psykiatrien Nord, Aalborg, Nordjylland, Denmark

Annette Margrethe Schlemmer, MD

Frederiksberg Hospital, The Parker Institute Nordre, Frederiksberg, Hovedstaden, Denmark

Lars Erik Kristensen, PhD, MD

Kiljava Medical Research, Hyvinkaa, Finland

Pentti Jarvinen, PhD, MD

Helsinki University Hospital, HYKS, Helsinki, Finland

Ritva Liisa Peltomaa, MD

Turun Yliopistollinen Keskussairaala, Turku, Finland

Laura Pirilä, PhD, MD

Terveystalo Kouvola, Kouvola, Finland

Jorma Vuotila, MD

Nouvel Hôpital Orléans La Source, Orleans, France

Eric Lespessailles, MD

Hôpital Trousseau, CHRU de Tours, Chambray-lès-Tours, Centre-Val de Loire, France

Philippe Goupille, MD

Centre Hospitalier Universitaire Lapeyroniém Montpellier, Occitanie, France

Bernard Combe, MD

Hôpital Pierre-Paul Riquet, Toulouse, Occitanie, France

Arnaud Constantin, MD

Centre Hospitalier de Vendée Les Oudairies, La Roche Sur Yon, Pays de la Loire, France

Gregoire Cormier, MD

Celine Cozic, MD

Hopital Edouard Herriot, Lyon, Auvergne-Rhône-Alpes, France

Cyrille B Confavreux, MD

Klinikum der Universität Münche, München, Bayern, Germany

Hendrik Schulze-Koops, MD

HRF Hamburger Rheuma, Hamburg, Hamburg, Germany

Andrea Everding, MD

Klinikum der Johann Wolfgang Goethe-Universität Frankfurt, Frankfurt am Main, Hessen, Germany

Micheala Kohm, MD

Rheumazentrum Ratingen, Ratingen, Nordrhein-Westfalen, Germany

Siegfried Wassenberg, MD

Obudai Egeszsegugyi Centrum Kft, Budapest, Budapest, Hungary

Magdolna Nagy, MD

Allergo-Derm Bakos Kft, Szolnok, Jasz-Nagykun-Szolnok, Hungary

Noemi Bakos, MD

UNO Medical Trials Kft., Budapest, Budapest, Hungary

Eva Melegh, MD

Vital Medical Center, Veszprem, Veszprem, Hungary

Edit Drescher, PhD, MD

Sir Ganga Ram Hospital, New Delhi, Delhi, India

Lalit Duggal, MD

Panchshil Hospital, Ahmedabad, Gujarat, India

Piyush Narayanbhai Joshi, MD

Apollo Gleneagles Hospitals, Kolkata, West Bengal, India

Srabani Ghosh Zoha, MD

King George Hospital, Visakhapatnam, Andhra Pradesh, India

A Ramakrishnam Naidu, MD

Shalby Hospital, Ahmedabad, Gujarat, India

Puja Pushkarkumar Srivastava, MD

Byramjee Jeejeebhoy Medical, Ahmedabad, Gujarat, India

Vishnu Devkinandan Sharma, MD

Ruby Hall Clinic and Grant Medical Foundation, Pune, Maharashtra, India

Ajit Bapurao Nalawadae, MD

Kokilaben Dhirubhai Ambani Hospital & Medical Research Inst., Mumbai, Maharashtra, India

Jyotsna Laxmikant Oak, MD

Krishna Institute of Medical Sciences Ltd., Secunderabad, Telengana, India

Sarath Chandra Mouli Veeravalli, MD

Care Hospital, Hyderabad, Andhra Pradesh, India

Jugal Kishore Kadel, MD

Mazumadar Shaw Medical Centre, Bangalore, Karnataka, India

Manisha Ashwin Daware, MD

Government Medical College & Sir Sayajirao General Hospital, Vadodara, Gujarat, India

Yogesh S Marfatia, MD

Artemis Hospital, Gurgaon, Haryana, India

Sumeet Agarwal, MD

Rambam Medical Center, Haifa, Israel

Yolanda Braun Moscovici, MD

Tel Aviv Sourasky Medical Center, Tel Aviv, Israel

Ori Elkayam, MD

Rabin Medical Center, Petach Tikva, Israel

Yair Molad, MD

Barzilai Medical Center, Ashkelon, Israel

Tatiana Reitblat, MD

Assaf Harofeh Medical Center, Zerifin, Israel

Moshe Tishler, MD

Meir Medical Center, Kfar Saba, Israel

Yair Levy, MD

Sheba Medical Center, Ramat Gan, Israel

Merav Lidar, MD

Carmel Medical Center, Haifa, Israel

Devy Zisman, MD

Istituto Clinico Humanitas, Rozzano, Milano, Italy

Antonio Costanzo, MD

Fondazione Universitaria degli Studi G D'Annunzio, Chieti Scalo, Chieti, Italy

Paolo Amerio, MD

Istituto Ortopedico Rizzoli, Bologna, Bologna, Italy

Riccardo Meliconi, MD

Presidio Ospedaliero Vittorio Emanuele, Catania, Catania, Italy

Rosario Foti, MD

Policlinico di Tor Vergata, Roma, Roma, Italy

Roberto Perricone, MD

Ospedale Policlinico Giambattista, Verona, Verona, Italy

Maurizio Rossini, PhD, MD

Complesso Integrato Columbus, Roma, Roma, Italy

Elisa Gremese, MD

Centro Medico del Angel S.C., Mexicali, Baja California, Mexico

Beatriz Elena Zazueta Montiel, MD

RM Pharma Specialists S.A. de C.V., Benito Juarez, Distrito Federal, Mexico

Juan Manuel Miranda Limon, MD



Centro Investigacion de Tratam Innovadores de Sinaloa SC, Culiacan, Sinaloa, Mexico

Marco Antonio Maradiaga Cecena, MD

CIMAB S.A. de C.V., Torreon, Coahuila, Mexico

Sandra Araceli Sicsik Ayala, MD

Clínica Enfermedades Crónicas y Procedimientos Especiales SC, Morella, Michoacan, Mexico

Miguel Angel Alvarez Guerrero, MD

Grupo Médico CAMINO S.C., México City, Distrito Federal, Mexico

Jorge Rojas Serrano, MD

Centro Multidisciplinario para el Desarrollo Especializado de la Investigación Clínica en Yucatán S.C.P.

Merida, Yucatán, Mexico

Efren Antonio Canul Novelo, MD

Ctro Inv en Artritis y Osteoporosis SC, Mexicali, Baja California, Mexico

Francisco Fidencio Cons-Molina, MD

Antonius Ziekenhuis, Sneek, Friesland, Netherlands

Ed N Griep, MD

"Dermed" Centrum Medyczne Sp. Z o.o., Łódź, Poland

Andrzej Kaszuba, MD

DermMEDICA Sp. z o.o., Wrocław, Poland

Jolanta Bogna Węglowska, MD

NZOZ Centrum Reumatologiczne Indywidualna Specjalistyczna Praktyka Lekarska lek.med. Barbara

Bazela, Elbląg, Poland

Barbara Bazela, MD

Rheuma Medicus Zakład Opieki Zdrowotnej, Warszawa, Poland

Maria Rell-Bakalarska, MD

Twoja Przychodnia-Centrum Medyczne Nowa Sól, Nowa Sól, Poland

Malgorzata Miakisz, MD

Arthritis Clinical Research Trial Unit, Pinelands, Western Cape, South Africa

Catherine Elizabeth Spargo, MD

Suite 209A Jakaranda Hospital, Pretoria, South Africa

Elsa Margaretha Van Duuren, MD

Suite 509 Umhlanga Netcare Medical Centre, Durban, KwaZulu-Natal, South Africa

Asokan Naidoo, MD

Clinresco Centres (Pt) Ltd, Johannesburg, Gauteng, South Africa

Nomawethu Cleopatra Matsiliza, MD

Emmed Research, Muckleneuk, Pretoria, South Africa

Johannes Breedt, MD

Winelands Medical Research Centre, Stellenbosch, Western Cape, South Africa

Gareth Scott Tarr, MD

Greenacres Hospital, Port Elizabeth, Eastern Cape, South Africa

Jenny Potts, MD

St Augustine's Hospital, Durban, South Africa

Savithree Nayiager, MD

University of Pretoria, Pretoria, South Africa

Mahmood Moosa Tar Mahomed Ally, MD

Complejo Hospitalario Universitario A Coruña, CHUAC, La Coruña, Spain

Francisco Javier Blanco Garcia, PhD, MD

Hospital Clinico Universitario de Santiago, La Coruña, Spain

Antonio Mera Varela, PhD, MD

Hospital Marina Baixa, Alicante, Spain

Jose Rosas, PhD, MD

Hospital Infanta Luisa, Sevilla, Spain

Juan Miguel Sanchez Burson, PhD, MD

HOSPITAL DEL SAGRADO CORAZON, Barcelona, Spain

Javier Garcia Miguel, PhD, MD

Reumatologiska Kliniken Karolinska Universitetssjukhuset Solna, Stockholm, Sweden

Jon Lampa, PhD, MD

Reumatologikliniken Västmanlands Sjukhus, Västerås, Västmanland, Sweden

Milad Rizk, MD

Reumatologiska Kliniken Skånes Universitetssjukhus Malmö, Malmö, Sweden

Giovanni Cagnotto, MD

Centrum för Reumatologi Akademiskt Specialistcentrum, Stockholm, Sweden

Per Larsson, MD

Guozhong Fei, PhD, MD

Kantonsspital St. Gallen, St. Gallen, Switzerland

Ruediger Mueller-Mar, MD

Andrea Rubbert-Roth, MD

HUG-Hôpitaux Universitaires de Genève, Genève, Switzerland

Michael John Nissen, MD

Kyiv City Clinical Hospital #3, Kyiv, Ukraine

Oleh Iaromenko, PhD, MD

Regional Clinical Hospital Center for Emergency medical care and disaster medicine, Kharkiv, Ukraine

Svitlana Anatoliivna Trypilka, PhD, MD

Zaporizhzhia Regional Clinical Hospital of Zaporizhzhia Regional Council, Zaporizhzhia, Ukraine

Dmytro Rekalov, PhD, MD

Vinnytsya Regional Clinical Hospital n.a. M.I.Pyrogov, Vinnytsya, Ukraine

Mykola Stanislavchuk, PhD, MD

University Clinic of Odesa National Medical University, Odesa, Ukraine

Viktoriiia Viktorivna Vasylets, MD

National Scientific Center "Strazhesko institute of cardio," Kyiv, Ukraine

Olena Garmish, PhD, MD

Ternopil University Hospital, Ternopil, Ukraine

Svitlana Smiyan, MD

North Tyneside General Hospital, North Shields, Tyneside, United Kingdom

David Walker, MD

Addenbrookes Hospital Cambridge University Hospitals, Cambridge, Cambridgeshire, United Kingdom

Deepak Jadon, PhD, MD

Western General Hospital, Edinburgh, Scotland, United Kingdom

Prof Stuart Ralston, MD

Stephen Boyle, MD

Whipps Cross University Hospital, Leytonstone, London, United Kingdom

Hasan Tahir, MD

Wythenshawe Hospital, Wythenshawe, Manchester, United Kingdom

Pippa Anne Watson, MD

Wishaw General Hospital, Wishaw, Glasgow, United Kingdom

James E Dale, MD

St Lukes Hospital, Bradford, West Yorkshire, United Kingdom

Philip Helliwell, MD

The Great Western Hospital, Swindon, Wiltshire, United Kingdom

Sara Carty, MD

The Dudley Group NHS Foundation Trust, Dudley, West Midlands, United Kingdom

Karen Douglas, MD

Southampton General Hospital, Southampton, Hampshire, United Kingdom

Christopher J Edwards, MD

Royal Cornwall Hospital, Truro, Cornwall, United Kingdom

David Hutchinson, MD

New Cross Hospital, Wolverhampton, West Midlands, United Kingdom

Nick Barkham, MD

## INCLUSION/EXCLUSION CRITERIA

### Inclusion criteria

Patients were eligible to be included in the study only if they met all of the following criteria at screening:

1. Patients with a documented diagnosis of psoriatic arthritis (PsA) for at least 6 months fulfilling the Classification for Psoriatic Arthritis (CASPAR) and the activity of disease as defined by the presence of at least 3 swollen joints (66 joints) and 3 tender joints (68 joints) in patients who were biologic disease-modifying anti-rheumatic drugs (bDMARD) naive. Patients must have had active psoriatic skin lesions (plaque) of plaque psoriasis with a body surface area (BSA) of at least 3% at screening (Visit 1) and randomization (Visit 2).
  1. Were male or female patients 18 years or older
    - a. Male patients agreed to use a reliable method of birth control during the study.
    - b. Female patients who were:
      - i. Women of childbearing potential who tested negative for pregnancy and agreed to use a reliable method of birth control or remained abstinent during the study and for at least 12 weeks after the last dose of investigational product, whichever was longer. Methods of contraception considered acceptable when used properly included oral contraceptives, contraceptive patch, injectable or implantable contraceptives, intrauterine device, vaginal ring, diaphragm with contraceptive gel, or condom with contraceptive foam.
      - ii. Women of nonchildbearing potential, defined as women who had surgical sterilization (hysterectomy, bilateral oophorectomy, or tubal ligation);
- OR

Women who were  $\geq 60$  years of age;

OR

Women who were  $\geq 40$  and  $< 60$  years of age who had a cessation of menses for  $\geq 12$  months and a FSH test confirming nonchildbearing potential ( $\geq 40$  mIU/mL).

2. Had a documented diagnosis of psoriatic arthritis (PsA) for at least 6 months and met the Classification for Psoriatic Arthritis (CASPAR) criteria
3. Had active PsA defined as the presence of at least 3/68 tender and at least 3/66 swollen joints at visit 1 (screening) and visit 2 (week 0)
4. Had active psoriatic skin lesions (plaque psoriasis) with a body surface area (BSA)  $\geq 3\%$  at visit 1 (screening) and visit 2 (week 0)
5. Were biologic disease-modifying antirheumatic drug (bDMARD) naive
6. Had an inadequate response when treated with 1 or more conventional synthetic disease-modifying antirheumatic drugs (csDMARDs)
7. Had given written informed consent approved by Lilly or its designee and the ethical review board governing the site

#### **Exclusion criteria**

Patients were to be excluded from study enrollment if they met any of the following criteria at screening:

8. Were enrolled in any other clinical trial involving an investigational product or any other type of medical research judged not to be scientifically or medically compatible with this study
9. Received any prior treatment with any bDMARD therapy or small molecule for PsA or for psoriasis, including investigational therapies (such as, but not limited to, tumor necrosis factor  $\alpha$  (TNF) inhibitors, interleukin (IL)-1 receptor antagonists, IL-6 inhibitors, anti-IL-12/23p40



therapies, T-cell or B-cell–targeted therapies, or Janus kinase inhibitors)

Exception: Previous treatment of phosphodiesterase type 4 inhibitors was permitted. Treatment with phosphodiesterase type 4 inhibitors must have been discontinued at least 8 weeks before randomization (visit 2).

10. Had previously completed or withdrawn from this study or any other study investigating ixekizumab (IXE) or other IL-17 inhibitors, eg, anti-IL-17 or anti-IL-17 receptor (anti-IL-17R) monoclonal antibodies
11. Had a history of drug-induced psoriasis.
12. Used csDMARDs other than methotrexate, leflunomide, sulfasalazine, or cyclosporine in the 8 weeks prior to randomization (visit 2)
13. Discontinued use of methotrexate, sulfasalazine, or cyclosporine within 12 weeks prior to randomization  
  
If taking methotrexate, leflunomide, sulfasalazine, or cyclosporine, must have been treated for at least 12 weeks prior to randomization (visit 2) and on a stable dose for at least 8 weeks prior to randomization, as follows: oral or parenteral methotrexate, 10 to 25 mg/week; leflunomide, 20 mg/day; sulfasalazine, up to 3 g/day; or cyclosporine, up to 5 mg/kg/day. The dose of these allowed concomitant medications must have remained unchanged during the first 24 weeks of the open-label treatment period unless changes were required for safety issues. Local standard of care was to be followed for concomitant administration of folic acid with methotrexate.
14. Discontinued use of leflunomide within 4 weeks prior to randomization (visit 2) or received leflunomide from 4 to 12 weeks prior to randomization and had not undergone a drug elimination procedure
15. Used oral corticosteroids at average daily doses of >10 mg/day of prednisone or its equivalent, or used variable doses of any oral corticosteroids, within 4 weeks prior to randomization (visit 2)

16. Received any parenteral glucocorticoid administered by intraarticular, intramuscular, or intravenous (IV) injection within 6 weeks prior to randomization (visit 2), or a parenteral injection of glucocorticosteroids was anticipated during the first 24 weeks of the open-label treatment period
17. Concomitantly used nonsteroidal anti-inflammatory drugs or cyclooxygenase-2 inhibitors, unless the patient was on a stable dose for at least 2 weeks prior to randomization (visit 2)
18. Used any opiate analgesic at average daily doses of >30 mg/day of morphine or its equivalent, or used variable doses of any opiate analgesic, within 6 weeks prior to randomization (visit 2)
19. Received systemic nonbiologic psoriasis therapy other than csDMARDs or corticosteroids as indicated above (including, but not limited to, oral psoralens and ultraviolet A light therapy oral retinoids, thioguanine, hydroxyurea, sirolimus, azathioprine, fumaric acid derivatives, or 1, 25 dihydroxy vitamin D3 and analogs) or phototherapy (including either oral and topical ultraviolet A, ultraviolet B, or self-treatment with tanning beds or therapeutic sunbathing) within 4 weeks prior to randomization (visit 2);  
  
OR  
  
Had topical psoriasis treatment within the previous 2 weeks prior to randomization (visit 2)  
  
Exceptions: Weak-potency (WHO Group 1 classification) topical steroids were permitted.
20. Had plaque psoriasis and could not avoid use of tanning booths for at least 4 weeks prior to randomization (visit 2) and during the study
21. Had a known allergy or hypersensitivity to any biologic therapy that would pose an unacceptable risk to the patient if participating in this study
22. Had ever received efalizumab or natalizumab or other agents that target alpha-4-integrin
23. Received a live vaccination within 12 weeks prior to randomization (visit 2), or intended to receive a live vaccination during the course of the study or within 12 weeks of completing

treatment in this study, or had participated in a vaccine clinical study within 12 weeks prior to randomization (visit 2). Investigators should have reviewed the vaccination status of their patients and followed the local guidelines for adult vaccination with nonlive vaccines intended to prevent infectious disease prior to therapy.

Note: Killed/inactive or subunit vaccines were expected to be safe; however, their efficacy with concomitant IXE treatment is unknown.

24. Received a vaccination with Bacillus Calmette-Guérin (BCG) within 12 months prior to randomization (visit 2), or intend to receive a vaccination with BCG during the course of the study or within 12 months of completing treatment in this study
25. Had a diagnosis of other inflammatory arthritic syndromes such as rheumatoid arthritis, ankylosing spondylitis, reactive arthritis, or enteropathic arthritis
26. Had active Crohn's disease or active ulcerative colitis
27. Had fibromyalgia or other chronic pain condition that would confound evaluation of the patient
28. Had evidence of active vasculitis or uveitis
29. Had surgical treatment of a joint within 8 weeks prior to randomization (visit 2) or required such up to week 24
30. Had any major surgery within 8 weeks prior to randomization (visit 2) or required such during the study that, in the opinion of the investigator and in consultation with the sponsor or its designee, would have posed an unacceptable risk to the patient
31. Had a diagnosis or history of malignant disease within the 5 years prior to randomization (visit 2). Note: Patients with successfully treated basal-cell carcinoma (no more than 3) or squamous-cell carcinoma of the skin (no more than 2) within the 5 years prior to randomization may participate in the study.

32. Presence of significant uncontrolled cerebrocardiovascular events (eg, myocardial infarction [MI], unstable angina, unstable arterial hypertension, moderate-to-severe [NYHA class III/IV] heart failure, or cerebrovascular accident); respiratory, hepatic, renal, gastrointestinal, endocrine, hematologic, neurologic, or neuropsychiatric disorders; abnormal laboratory values; or illicit drug use (including cannabinoids, whether legalized or not) at screening (visit 1) that, in the opinion of the investigator, posed an unacceptable risk to the patient if participating in the study or of interfering with the interpretation of data
33. Had a history of uncompensated heart failure, fluid overload, or MI or evidence of new-onset ischemic heart disease or other serious cardiac disease within 12 weeks prior to randomization (visit 2)
34. Presence of significant uncontrolled neuropsychiatric disorder; had recent history (within 30 days prior to screening [visit 1] and any time between screening [visit 1] and randomization [visit 2]) of a suicide attempt; or developed active suicidal ideation with some intent to act with or without a specific plan (yes to question 4 or 5 on the “Suicidal Ideation” portion of the Columbia–Suicide Severity Rating Scale [C-SSRS]) or developed suicide-related behaviors as recorded on the C-SSRS at screening (visit 1) or randomization (visit 2); or were clinically judged by the investigator to be at risk for suicide
35. Had presence or personal history or family history (first-degree relative) of demyelinating disorder
36. Patients who had:
  - a. in the past 12 weeks prior to randomization:
    - i. had a serious infection (eg, pneumonia, cellulitis)
    - ii. had been hospitalized for an infection
    - iii. had received IV antibiotics for an infection

- b. in the past 24 weeks prior to randomization had a serious bone or joint infection
  - c. ever had
    - i. an infection of an artificial joint
    - ii. an infection that occurred with increased incidence in an immunocompromised host (including, but not limited to, *Pneumocystis jirovecii* pneumonia, active histoplasmosis, or coccidioidomycosis); or had a known immunodeficiency
37. Had a known immunodeficiency or were immunocompromised to an extent such that participation in the study would have posed an unacceptable risk to the patient
38. Had a herpes zoster or any other clinically apparent varicella zoster virus infection within 12 weeks prior to randomization (visit 2)
39. Had evidence or suspicion of active or latent tuberculosis (TB) (refer to section below on chest X-ray and tuberculosis testing for details on determining full TB exclusion criteria)
40. Had any other active or recent infection other than mentioned above within 4 weeks of randomization (visit 2) that, in the opinion of the investigator, would have posed an unacceptable risk to the patient if participating in the study
- Note: These patients were eligible to be rescreened 1 time  $\geq 4$  weeks after documented resolution of symptoms.
41. Had a sitting systolic blood pressure  $>160$  mm Hg or diastolic blood pressure  $>100$  mm Hg.
- Note: Determined by 2 consecutive elevated readings. If an initial sitting blood pressure reading exceeded this limit, the blood pressure may have been repeated once after the patient had rested sitting for  $\geq 10$  minutes. If the repeat value was less than the criterion limits, the second value may have been accepted.
42. Tested positive for human immunodeficiency virus (HIV) serology, ie, positive for human immunodeficiency virus antibody (HIVAb)

43. Had evidence of or tested positive for hepatitis B virus (HBV) by testing positive for: 1) HBV surface antigen (HBsAg+); OR 2) anti-hepatitis B core antibody (HBcAb+) and were HBV deoxyribonucleic acid (DNA) positive

Note: Patients who were HBsAg- and HBcAb+ and HBV DNA negative may be enrolled in the study. Patients who met these criteria at screening were to be identified by the central laboratory and monitored during the study.

44. Had evidence of or tested positive for hepatitis C virus (HCV). A positive test for HCV is defined as: positive for hepatitis C antibody (anti-HCVAb) and positive via a confirmatory test for HCV (for example, HCV polymerase chain reaction).

45. Laboratory tests may not have been repeated unless there was a technical error or clinical reason to believe a result may have been erroneous. Laboratory tests could be repeated a maximum of 1 time, and results must have been received and reviewed prior to randomization (visit 2). For eligibility, the most recent lab panel must not have met any of the following criteria:

- a. Neutrophil count <1500 cells/ $\mu$ L
- b. Lymphocyte count <800 cells/ $\mu$ L
- c. Platelet count <100,000 cells/ $\mu$ L
- d. Aspartate aminotransferase (AST) or alanine aminotransferase (ALT) >2.5 times the upper limit of normal (ULN)
- e. Total white blood cell count <3000 cells/ $\mu$ L
- f. Hemoglobin <8.5 g/dL (85.0 g/L) for male patients and <8.0 g/dL (80 g/L) for female patients
- g. Serum creatinine >2.0 mg/dL

- h. Clinical laboratory test results at screening that were outside the normal reference range for the population and were considered clinically significant, per investigator assessment.
46. Had any condition or contraindication as addressed in the local labelling for adalimumab (ADA) that would preclude the patient from participation in the study
  47. Had any other condition that precluded the patient from following and completing the study, in the opinion of the investigator
  48. Women who were breastfeeding
  49. Were study site personnel directly affiliated with this study and/or their immediate families. Immediate family is defined as a spouse, parent, child, or sibling, whether biological or legally adopted.
  50. Were employees of the sponsor or its designee or employees of third-party organizations involved in the study
  51. Were concurrently enrolled in or discontinued from a clinical trial involving an investigational product or nonapproved use of a drug or device within the last 4 weeks or a period of at least 5 half-lives of the last administration of the drug, whichever was longer, or concurrently enrolled in any other type of medical research judged not to be scientifically or medically compatible with this study
  52. Were unwilling or unable to comply with the use of a data collection device to directly record data from the patient

#### **Chest X-Ray and Tuberculosis Testing**

X-ray

At visit 1, a posterior-anterior view chest x-ray was to be obtained locally, unless the x-ray or results from a chest x-ray obtained within 6 months before randomization (visit 2) were available. The chest x-ray or results were to be reviewed by the investigator or designee to exclude patients with active TB infection.

#### TB Testing

Patient history of TB test results should have been assessed prior to screening (visit 1). Patients with no TB test results on file: Patients were to be tested at screening. A purified protein derivative (PPD) skin test response of  $\geq 5$  mm induration, between approximately 48 and 72 hours after test application, regardless of BCG vaccination history, were to be considered a positive result. In countries where the QuantiFERON-TB<sup>®</sup> Gold test or T-SPOT.TB test is available and in the judgment of the investigator preferred as an alternative to the PPD skin test for the evaluation of TB infection, it may have been used instead of the PPD test and was to be performed and read locally. If the QuantiFERON-TB<sup>®</sup> Gold test or the T-SPOT.TB test was indeterminate, 1 retest using the same TB test method was allowed. If the retest was indeterminate, then the patient was to be excluded from the study.

Patients with a positive TB test performed at screening (visit 1) but with no other evidence of active TB were eligible to be rescreened 1 time and enrolled without repeating the TB test based on the following requirements:

- after receiving at least 4 weeks of appropriate latent TB infection therapy
- with no evidence of hepatotoxicity (ALT/AST must remain  $\leq 2$ x ULN) upon retesting of serum ALT/AST prior to randomization (visit 2). Such patients must have completed appropriate latent TB infection therapy during the course of the study to remain eligible.
- met all other inclusion and exclusion criteria for participation



If rescreening occurred within 6 months of the date of the screening chest x-ray, there was no need for repeat of chest x-ray for enrollment consideration.

#### Patients With Negative TB Test Results on File

Patients with documentation of a negative test result within 3 months before randomization (visit 2) should not have been administered a TB test at screening (visit 1). Documentation of PPD test results must have included a record of the size of the induration response; otherwise a retest at screening (visit 1) was required to determine patient eligibility.

#### Patients With Positive TB Test Results on File

Patients with prior history of a positive TB test should not receive a TB test at screening (visit 1). Documentation of this history and of at least 4 weeks of appropriate latent TB treatment prior to randomization (visit 2) was required for study eligibility. Patients who had a documented history of completing an appropriate TB treatment regimen with no history of re-exposure to TB since their treatment was completed and no evidence of active TB were eligible to participate in the study. Patients who had household contact with a person with active TB were to be excluded, unless appropriate and documented prophylaxis for TB was given.

## **SUPPLEMENTARY METHODS**

### **Randomization and Blinding**

Assignment to treatment groups was determined by a computer-generated random sequence using an interactive web-response system (IWRS). Site personnel confirmed the correct investigational product by entering a confirmation number found on the investigational product into the IWRS.

Blinded assessors were not allowed to know patient allocation or to be otherwise involved in study procedures, and patients were instructed not to communicate with blinded assessors except for communication required to conduct the blinded data assessment. A third person from the study site was present during each procedure conducted by the blinded assessor to observe and document that the blinding of the assessor was maintained. If unintentionally unblinded, the blinded assessor was replaced. Blinded assessors were required to have at least 1 year of experience for administering the outcome instruments.

### **List of Study Endpoints**

Primary endpoint:

- Proportion of patients simultaneously achieving American College of Rheumatology criteria (ACR50) and Psoriasis Area and Severity Index (PASI100) at week 24

Major secondary endpoints:

- Proportion of patients achieving ACR50 in each treatment group at week 24
- Proportion of patients achieving PASI100 in each treatment group at week 24

PsA endpoints:

- Proportion of patients achieving ACR20, ACR50, and ACR70 responses
- Change from baseline in individual components of the ACR Core Set: tender joint count (TJC), swollen joint count (SJC), patient's pain assessment, patient's global assessment of disease activity, physician's global assessment of disease activity, C-reactive protein (CRP), and Health Assessment Questionnaire–Disability Index (HAQ-DI) score
- Proportion of patients simultaneously achieving ACR50 and PASI100 response
- Change from baseline in the Disease Activity Score (28 diarthrodial joint count) based on CRP (DAS28-CRP)
- Proportion of patients achieving minimal disease activity (MDA)
- Proportion of patients achieving Psoriatic Arthritis Response Criteria (PsARC)
- Change from baseline in modified Composite Psoriatic Disease Activity Index (mCPDAI) score
- Proportion of patients achieving low disease activity or remission according to the mCPDAI definition
- Proportion of patients with HAQ-DI improvement  $\geq 0.35$
- Change from baseline in the Spondyloarthritis Research Consortium of Canada (SPARCC) Enthesitis Index score in patients with enthesitis at baseline (ie, baseline SPARCC Enthesitis Index score  $>0$ )
- Change from baseline in the Leeds Enthesitis Index (LEI) score in patients with enthesitis at baseline (ie, baseline LEI score  $>0$ )
- Proportion of patients with resolution in enthesitis in the subgroup of patients with enthesitis at baseline as measured by the SPARCC Enthesitis Index (ie, baseline SPARCC Enthesitis Index score  $>0$ )
- Proportion of patients with resolution in enthesitis in the subgroup of patients with enthesitis at baseline as measured by the LEI (ie, baseline LEI score  $>0$ )

- Change from baseline in the Leeds Dactylitis Index-Basic (LDI-B) score in patients with dactylitis at baseline (ie, baseline LDI-B score >0)
- Proportion of patients with resolution in dactylitis in the subgroup of patients with dactylitis at baseline as measured by the LDI-B (ie, baseline LDI-B score >0)

Psoriasis/nail endpoints:

- Change from baseline in BSA
- Proportion of patients who achieve the following PASI scores: PASI75, PASI90, or PASI100 (defined as 75%, 90%, and 100% improvement from baseline in PASI criteria, respectively)
- Proportion of patients achieving an absolute PASI score  $\leq 1$  or  $\leq 2$  or  $\leq 3$
- Change from baseline in the Nail Psoriasis Severity Index (NAPSI) fingernails score in the subgroup of patients with fingernail involvement at baseline (ie, baseline NAPSI fingernails score >0)

Quality of life endpoints:

- Change from baseline in the Itch Numeric Rating Scale (NRS) score
- Proportion of patients with Itch NRS score equal to 0
- Change from baseline in Fatigue Severity NRS score
- Change from baseline in Medical Outcomes Study 36-Item Short Form Health Survey (SF-36)
  - Physical Component Summary score
  - Mental Component Summary score
- Change from baseline in measures of health utility (European Quality of Life–5 Dimensions 5 Level health outcomes instrument [EQ-5D-5L])
- Change from baseline in Dermatology Life Quality Index (DLQI) total score

- Change from baseline in Treatment Satisfaction Questionnaire

Safety endpoints:

- Change from baseline in C-SSRS

### **Outcome Measures**

ACR20, ACR50, and ACR70 responses are defined as an improvement from baseline of  $\geq 20\%$ ,  $\geq 50\%$ , or  $\geq 70\%$ , respectively, in TJC (68 joints), SJC (66 joints), and at least 3 of the 5 ACR Core Set criteria: patient's assessment of pain (patient pain) visual analog scale (VAS), patient's global assessment of disease activity (PatGA) VAS, physician's global assessment of disease activity (PGA) VAS, patient's assessment of physical function as measured by the HAQ-DI, and CRP. CRP was the ACR Core Set measure of acute-phase reactant and was measured with a high-sensitivity assay at a central laboratory to assess the effect of IXE on the patient's PsA.

Patients were classified as achieving MDA if they fulfilled 5 of 7 of the MDA components (TJC  $\leq 1$ ; SJC  $\leq 1$ ; PASI total score  $\leq 1$  or BSA  $\leq 3$ ; patient pain VAS score  $\leq 15$ ; PatGA VAS score  $\leq 20$ ; HAQ-DI score  $\leq 0.5$ ; and tender enthesal points  $\leq 1$ ). Patients were classified as achieving VLDA if they fulfilled 7 of 7 of the MDA components.

The DAPSA is a composite measure that includes TJC (68 joints) and SJC (66 joints), PatGA VAS, patient pain VAS, and CRP. DAPSA is calculated from the sum of the PatGA and patient pain VAS in centimeters and TJC, SJC, and CRP level in mg/dL. Higher scores reflect more severe disease activity.[1] Patients are classified as achieving DAPSA remission if they achieve a DAPSA score  $\leq 4$  and DAPSA low disease activity or remission if they achieve a DAPSA score  $\leq 14$ .[2]

The PASDAS is a weighted index comprising assessments of joints, function, acute phase response, quality of life, and the PGA VAS and PatGA VAS (0mm to 100mm). The TJC is 68 joints and the SJC is 66 joints. The score range of the PASDAS is 0 to 10, with worse disease activity represented by higher scores. [3] PASDAS low disease activity and near remission are defined as scores of  $\leq 3.2$  or  $\leq 1.9$ , respectively.[4, 5]

The mCPDAI is a validated instrument intended to assess composite psoriatic disease activity and response to therapy.[6] This instrument assesses individual domains involved, as well as the global effect of disease in all dimensions by which each patient may be affected. Domains include peripheral arthritis as assessed by the number of tender and swollen joints and the HAQ-DI, skin as assessed by the PASI and the DLQI, enthesitis as assessed by the number of sites with enthesitis and the HAQ-DI, and dactylitis as assessed by the number of digits affected and the HAQ-DI. Scores range from 0 to 12, with a higher score indicating higher disease activity.

For TJC, the number of tender and painful joints was determined by examination of 68 joints. Joints were assessed for tenderness by pressure and joint manipulation on physical examination. The patient was asked for pain sensations on these manipulations and watched for spontaneous pain reactions. Any positive response on pressure, movement, or both were translated into a single tender-versus-nontender dichotomy. For SJC, the number of swollen joints was determined by examination of 66 joints. Joints were classified as either swollen or not swollen. Swelling was defined as palpable fluctuating synovitis of the joint. Swelling secondary to osteoarthritis was assessed as not swollen, unless there was unmistakable fluctuation. Dactylitis was counted as 1 swollen joint. For TJC or SJC assessments, any joints that required intra-articular injections during the study were excluded from evaluation from the time of the injection to the conclusion of the study. Missing, replaced, ankylosed, or

arthrodesed joints were identified by the investigator at screening and were excluded from evaluation during the trial.

For the patient pain VAS, patients were asked to assess the current level of joint pain by marking a vertical tick on a 100-mm horizontal VAS where the left end represents no joint pain and the right end represents worst possible joint pain. The patient pain VAS was administered prior to the TJC and SJC examinations. For the PatGA VAS, the patient's overall assessment of PsA activity was recorded using the 100-mm horizontal VAS. Patients were asked, "Considering all the ways your PsA has affected you, how do you feel your PsA is today?" where the left end represents "very well" and the right end represents "very poor." The PGA VAS was assessed by the investigator, who was required to be a physician. The investigator was asked to give an overall assessment of the severity of the patient's current PsA activity using a 100-mm horizontal VAS, where 0 represents no disease activity and 100 represents extremely active disease. Results for each of these VAS outcomes were expressed in millimeters measured between the left end of the scale and the crossing point of the vertical line of the tick.

Enthesitis was assessed using the LEI and the SPARCC Enthesitis Index. LEI measures enthesitis at 6 sites (lateral epicondyle, left and right; medial femoral condyle, left and right; Achilles tendon insertion, left and right).[7] Each site was assigned a score of 0 (absent) or 1 (present); the results from each site were then added to produce a total score (range 0 to 6). The SPARCC Enthesitis index evaluates tenderness in a total of 16 enthesitis sites: the greater trochanter (right/left [R/L]), quadriceps tendon insertion into the patella (R/L), patellar ligament insertion into the patella and tibial tuberosity (R/L), Achilles tendon insertion (R/L), plantar fascia insertion (R/L), medial and lateral epicondyles (R/L), and supraspinatus insertion (R/L).[1] Tenderness at each site was quantified on a dichotomous basis (0=nontender and 1=tender). The results from each site were then added to produce a total score (range 0 to 16).

Dactylitis was measured using the LDI-B. Once the presence of dactylitis was established in each digit, the ratio of the circumference of the affected digit to the circumference of the digit on the opposite hand or foot was measured.[8] Each dactylitic digit is defined by a minimum increase of 10% in circumference over the contralateral digit. If the same digits on each hand or foot were thought to be involved, the clinician would refer to a table of normative values (provided to study sites) for a value that would be used to provide the comparison. If the ratio was  $>1.1$ , then 1 was subtracted from the calculated ratio and multiplied by 100 and the tenderness score of 0 (not tender) or 1 (tender). Otherwise, if the ratio of the circumference of the digit was  $\leq 1.1$ , then the LDI-B score was set to 0. Tenderness was assessed in the area between the joints. The results of each digit were then added to produce a total score.[9]

The PASI combined assessments of the extent of BSA involvement in 4 anatomical regions (head, trunk, arms, and legs) and the severity of desquamation (scaling), erythema, and plaque induration/infiltration (thickness) in each region, yielding an overall score from 0 for no psoriasis up to 72 for the most severe disease.[10] Patients achieving PASI75, 90, or 100 were defined as having an improvement of at least 75%, 90%, or 100%, respectively, in the PASI compared with baseline. The sPGA was used to assess psoriasis lesions overall at a given time point. Overall lesions were categorized by descriptions for induration, erythema, and scaling. For the analysis of responses, the patient's psoriasis was assessed at a given time point on a 6-point scale in which 0=cleared, 1=minimal, 2=mild, 3=moderate, 4=severe, and 5=very severe. Assessment of % BSA was conducted on a continuous scale from 0% to 100%, in which 1% corresponds to the size of the patients hand (including palm, fingers, and thumb).[11]

The fingernail was divided with imaginary horizontal and longitudinal lines into quadrants. Each fingernail was given a score for nail bed psoriasis (0 to 4) and nail matrix psoriasis (0 to 4) depending on the presence (1) or absence (0) of any of the features of nail psoriasis in each quadrant. The NAPSI



finger nails score of a nail is the sum of scores in nail bed and nail matrix from each quadrant (thus a maximum of 8). Each fingernail was evaluated, and the sum of all the nails is the total NAPSI finger nails score. Thus, the sum of the scores from all finger nails is 0 to 80.

The HAQ-DI is a patient-reported standardized questionnaire that is commonly used in PsA to measure disease-associated disability (assessment of physical function). It consists of 24 questions referring to 8 domains: dressing/grooming, arising, eating, walking, hygiene, reach, grip, and other daily activities.[12, 13] The disability section of the questionnaire scores the patient's self-perception on the degree of difficulty (0=without any difficulty, 1=with some difficulty, 2=with much difficulty, and 3=unable to do), covering the 8 domains. The reported use of special aids or devices and/or the need for assistance of another person to perform these activities is also assessed. The scores for each of the functional domains will be averaged to calculate the functional disability index. The HAQ-DI minimally clinically important difference (MCID) has been estimated to be about 0.35 for patients with PsA.[14] An MCID is a clinically relevant change in a patient's status.

The DLQI is a simple, patient-administered, 10-question, validated, quality-of-life questionnaire that covers 6 domains: symptoms and feelings, daily activities, leisure, work and school, personal relationships, and treatment. Response categories include "not at all," "a little," "a lot," and "very much," with corresponding scores of 0, 1, 2, and 3, respectively, and "not relevant" responses scored as "0." Totals range from 0 to 30 (less to more impairment).

The C-SSRS is a scale that captures the occurrence, severity, and frequency of suicide-related ideations and behaviors during the assessment period.[15, 16] The C-SSRS was required to be administered by appropriately trained site personnel. The tool was developed by the National Institute of Mental Health Treatment of Adolescent Suicide Attempters (TASA) trial group for the purpose of being a counterpart to the Columbia Classification Algorithm of Suicide Assessment (C-CASA) categorization of suicidal events.

The Self-Harm Supplement Form is a 1-question form that asks for the number of suicidal or nonsuicidal self-injurious behaviors the patient has experienced since the last assessment. For each unique event identified, a questionnaire (Self-Harm Follow-Up Form) that collects supplemental information on the self-injurious behavior was completed.

The TJC, SJC, BSA, and C-SSRS were assessed at screening, baseline, and post-baseline visits from week 4 to 52. The patient pain VAS, PatGA VAS, PGA VAS, LEI, SPARCC Enthesitis Index, PASI, HAQ-DI, and DLQI were assessed at baseline and post-baseline visits from week 4 to 52. LDI-B and NAPSIF fingernails were assessed at baseline and each post-baseline visit from week 12 to 52. The sPGA was assessed at the baseline visit only. Blinded assessors evaluated the TJC, SJC, LEI, SPARCC Enthesitis Index, PASI, sPGA, BSA, and NAPSIF fingernails.

#### **Adjudication of Cerebrocardiovascular Events and Suspected Inflammatory Bowel Disease**

Data on cerebrocardiovascular events were adjudicated by an external Clinical Events Committee (CEC) made up of a chairman, 2 cardiologists, and a neurologist. Data on suspected inflammatory bowel disease (IBD), as identified by events possibly indicative of ulcerative colitis and Crohn's disease, were adjudicated by an external CEC made up of gastroenterologists with expertise in IBD according to the EPIdemiologie des Maladies de l'Appareil Digestif (EPIMAD) criteria for adjudication of suspected IBD.[17] The role of the CEC was to adjudicate defined clinical events in a blinded, consistent, and unbiased manner throughout the course of the study.

#### **STATISTICAL ANALYSIS CONSIDERATIONS FOR THE PRIMARY OUTCOME MEASURE**

After the week 24 database lock and the initial run of the analyses, a data scenario reflecting a medical inconsistency was identified. Per inclusion criteria, patients must have had active psoriasis involvement with BSA  $\geq 3\%$ . Nine patients were found to have PASI=0 at baseline, although each patient met the

entry criteria of BSA  $\geq 3\%$ . This scenario was not explicitly described in the protocol and statistical analysis plan and therefore was not anticipated in the statistical coding; the standard programming codes were followed. Due to the denominator (ie, baseline PASI score) being 0, the percent improvement from baseline for PASI was not calculated for these 9 patients, and these 9 patients were labeled as “nonresponders” for PASI 75/90/100. The labeling of patients as nonresponders occurred before the sponsor became aware of the data issue (ie, 9 patients with baseline PASI=0).

Using the PASI and BSA study data from these patients, as well as medical judgment, it was established that these 9 patients were eligible patients who met the inclusion criteria per protocol (ie, active Ps with BSA  $\geq 3\%$ ). Therefore, the inclusion of these patients in the study was appropriate and aligned with the protocol.

Additionally, the longitudinal data were examined and provided evidence of clinical response for those patients who started with PASI=0 and BSA  $\geq 3\%$  at baseline and achieved both PASI=0 and BSA=0 at post-baseline visits.

The following approaches were used to address the data scenario for these 9 patients:

- Primary Analysis
  - A patient with baseline PASI=0 and baseline BSA  $\geq 3\%$  was considered a post-baseline PASI 100 responder if, and only if, PASI=0 and BSA=0 at the same postbaseline visit. PASI100 responders are also considered responders to PASI75 and 90.
- Sensitivity Analyses
  - Regardless of the BSA outcome, any patient with baseline PASI=0 and post-baseline PASI=0 was considered a PASI100 responder. If a patient with baseline PASI=0 had a post-baseline PASI  $>0$ , the patient was considered a nonresponder for that specific post-baseline visit.

- This approach used only PASI data when considering PASI response.
- Regardless if data were available, any patient with baseline PASI=0 was excluded from the analysis.
  - This approach assumed that the 9 patients were not eligible for inclusion in the study because baseline PASI=0 was not expected, thus also questioning the validity of the baseline BSA data. This approach draws the study conclusion based on evidence of those patients without data inconsistency at baseline, which is 98.4% of the entire study population.
- Additional Analysis
  - Regardless of the post-baseline outcome, any patient with baseline PASI=0 was considered a “nonresponder.”
    - This approach lacked medical and statistical support because it predetermined the response status of these 9 patients purely based on their baseline data even before they were allocated to any treatment.
    - This analysis produced the same results as the initial programming run, in which the standard program coding labeled the patients with baseline PASI=0 as nonresponders.

Results from these analyses are included in online supplementary Table S1. Results from the 2 sensitivity analyses at week 24 were consistent with the results of the primary analysis at week 24. The additional analysis resulted in a treatment difference that was not statistically significant. Given these observations and the totality of evidence of the study, the primary objective of the study was achieved.

## **SUPPLEMENTARY STATISTICAL METHODOLOGY**

### **Sample Size Determination**

#### Primary Endpoint (simultaneous ACR50 and PASI100)

Sample size was calculated assuming 31.3% and 13.6% of patients in the IXE and ADA treatment groups, respectively, would simultaneously achieve ACR50 and PASI100, as observed in the csDMARD-experienced population from the SPIRIT-P1 study (ClinicalTrials.gov: NCT01695239). According to nQuery software, a total sample size of 550 (ie, 275 patients per treatment group) using a 2-sided Fisher's exact test at 0.05 level of significance would yield approximately 99% power for testing IXE vs ADA.

#### Major secondary endpoint 1 (ACR50)

For testing the noninferiority of IXE to ADA for ACR50 response, assumed ACR50 response rates were 43.8% and 44.1% for the IXE and ADA treatment groups, respectively, as observed in the csDMARD-experienced population from the SPIRIT-P1 study. The sample size of 550 (as determined for the primary endpoint) would yield 78% power at a 1-sided 0.025 level of significance based on a noninferiority margin of -12%.

#### Major secondary endpoint 2 (PASI100)

For testing superiority of IXE to ADA for PASI 100 response, assumed PASI100 response rates were 46.9% and 23.7%, as observed for IXE and ADA in the csDMARD experienced population from the SPIRIT-P1 study. The sample size of 550 (as determined for the primary endpoint) would yield approximately 99% power using a 2-sided Fisher's exact test at 0.05 level of significance.

#### **Multiple Testing Procedure**

The primary and major secondary endpoints were sequentially tested in the following order to compare IXE vs ADA:

1. Test 1 for primary endpoint: Proportion of patients simultaneously achieving ACR50 and PASI100 at week 24.
  - a. A superiority test of the primary endpoint was performed at an overall 2-sided  $\alpha=0.05$ .
2. Test 2 for major secondary endpoint #1: Proportion of patients achieving ACR50 at week 24
  - a. If the test for the primary endpoint was significant, then a noninferiority test for the major secondary endpoint #1 was performed.
3. Test 3 for major secondary endpoint #2: Proportion of patients achieving PASI100 at week 24
  - a. If the test for major secondary endpoint #1 was significant, then a superiority test for major secondary endpoint #2 was performed.

If a test in this sequence was not significant, all subsequent tests were considered nonsignificant. There was no adjustment for multiple comparisons for any other analyses.

### **Noninferiority Testing**

For assessing noninferiority of IXE to ADA, missing data were imputed using the nonresponders imputation (NRI) method. Noninferiority analysis was performed on the intent-to-treat (ITT) population using a prespecified fixed margin approach. There is no universally accepted value for what is considered to be a clinically unimportant difference between 2 treatments for a particular efficacy measure. Points to consider from European Medicines Agency (EMA) Committee for Medicinal Products for Human Use (CHMP) and Food and Drug Administration (FDA) guidance state that an appropriate noninferiority margin should be based on both clinical and statistical grounds.[18, 19]

The null hypothesis was rejected if the lower bound of the 2-sided 95% confidence interval (CI) for the difference in proportions of responders on IXE minus ADA is greater than the prespecified margin, meaning IXE will be deemed noninferior to ADA. If the lower bound of the CI exceeds 0 (the corresponding p-value from the logistic regression model will also be produced), IXE will be deemed

superior to ADA based on the p-value. The 95% CIs for the difference in proportions will be calculated using the simple asymptotic method, without continuity correction (ie, normal approximation to the binomial distribution).

Based on EMEA CHMP, FDA guidance, and Weinblatt et al., a noninferiority margin of -12.0% for ACR50 between IXE and ADA (ie, response rate of IXE – response rate of ADA) is considered appropriate.[18-20] This noninferiority margin represents an approximately 50% preservation of the ADA treatment effect (based on the difference between ADA and placebo) observed in a historical Phase III study for ADA 40 mg twice weekly compared with placebo (ADEPT study) and the SPIRIT-P1 study of IXE where ADA was used as an active reference arm in patients with active PsA.[21, 22]

#### **Additional Details on Statistical Analyses**

Analyses were performed at the time (cutoff date) when the last patient completed the week 24 visit, early termination visit, or discontinued from the open-label treatment period. This database lock included all data collected by the cutoff date, including data after week 24. This database lock at week 24 was the primary database lock for the study, and all primary and major secondary study objectives were assessed at this time. A final database lock will occur after all enrolled patients have completed or discontinued the post-treatment follow-up period.

Mixed effects model of repeated measures analyses of continuous efficacy measures were conducted using a restricted maximum likelihood-based repeated measures approach. The covariance structure to model the within-patient errors was unstructured. Type III tests for the least squares means were used for the statistical comparison. Missing data were imputed using a modified baseline observation carried forward method. For patients discontinuing investigational product due to an adverse event, including death, the baseline observation was carried forward to the corresponding primary endpoint for evaluation. For patients discontinuing investigational product for any other reason, the last non-missing

post-baseline observation before discontinuation was carried forward to the corresponding time point of evaluation. Randomized patients without at least 1 post-baseline observation were not included for evaluation, with the exception of patients discontinuing study treatment due to an adverse event (including death).



**SUPPLEMENTARY REFERENCES**

1. Mease PJ. Measures of psoriatic arthritis: Tender and Swollen Joint Assessment, Psoriasis Area and Severity Index (PASI), Nail Psoriasis Severity Index (NAPSI), Modified Nail Psoriasis Severity Index (mNAPSI), Mander/Newcastle Enthesitis Index (MEI), Leeds Enthesitis Index (LEI), Spondyloarthritis Research Consortium of Canada (SPARCC), Maastricht Ankylosing Spondylitis Enthesis Score (MASSES), Leeds Dactylitis Index (LDI), Patient Global for Psoriatic Arthritis, Dermatology Life Quality Index (DLQI), Psoriatic Arthritis Quality of Life (PsAQOL), Functional Assessment of Chronic Illness Therapy-Fatigue (FACIT-F), Psoriatic Arthritis Response Criteria (PsARC), Psoriatic Arthritis Joint Activity Index (PsAJAI), Disease Activity in Psoriatic Arthritis (DAPSA), and Composite Psoriatic Disease Activity Index (CPDAI). *Arthritis Care Res (Hoboken)*2011;63 Suppl 11:S64-85.
2. Schoels MM, Aletaha D, Alasti F, et al. Disease activity in psoriatic arthritis (PsA): defining remission and treatment success using the DAPSA score. *Ann Rheum Dis*2016;75:811-8.
3. Helliwell PS, FitzGerald O, Franssen J, et al. The development of candidate composite disease activity and responder indices for psoriatic arthritis (GRACE project). *Ann Rheum Dis*2013;72:986-91.
4. Coates LC, Lubrano E, Perrotta FM, et al. What Should Be the Primary Target of "Treat to Target" in Psoriatic Arthritis? *J Rheumatol*2019;46:38-42.
5. Helliwell PS, FitzGerald O, Franssen J. Composite disease activity and responder indices for psoriatic arthritis: a report from the GRAPPA 2013 meeting on development of cutoffs for both disease activity states and response. *J Rheumatol*2014;41:1212-7.
6. Mumtaz A, Gallagher P, Kirby B, et al. Development of a preliminary composite disease activity index in psoriatic arthritis. *Ann Rheum Dis*2011;70:272-7.
7. Healy PJ, Helliwell PS. Psoriatic arthritis quality of life instrument: an assessment of sensitivity and response to change. *J Rheumatol*2008;35:1359-61.
8. Helliwell PS, Firth J, Ibrahim GH, et al. Development of an assessment tool for dactylitis in patients with psoriatic arthritis. *J Rheumatol*2005;32:1745-50.
9. Healy PJ, Helliwell PS. Measuring dactylitis in clinical trials: which is the best instrument to use? *J Rheumatol*2007;34:1302-6.
10. Fredriksson T, Pettersson U. Severe psoriasis--oral therapy with a new retinoid. *Dermatologica*1978;157:238-44.
11. Van Voorhees AS, Feldman SR, Lebwohl MG, et al. The psoriasis and psoriatic arthritis pocket guide - Treatment Algorithms and Management Options. <https://www.psoriasis.org/pocket-guide>. (accessed 2019 Feb 11).
12. Fries JF, Spitz P, Kraines RG, et al. Measurement of patient outcome in arthritis. *Arthritis Rheum*1980;23:137-45.
13. Fries JF, Spitz PW, Young DY. The dimensions of health outcomes: the health assessment questionnaire, disability and pain scales. *J Rheumatol*1982;9:789-93.
14. Mease PJ, Woolley JM, Bitman B, et al. Minimally important difference of Health Assessment Questionnaire in psoriatic arthritis: relating thresholds of improvement in functional ability to patient-rated importance and satisfaction. *J Rheumatol*2011;38:2461-5.
15. Columbia University Medical Center. Columbia-Suicide Severity Rating Scale (C-SSRS) web site. <http://www.cssrs.columbia.edu>. (accessed 2019 Feb 11).
16. Posner K, Oquendo MA, Gould M, et al. Columbia Classification Algorithm of Suicide Assessment (C-CASA): classification of suicidal events in the FDA's pediatric suicidal risk analysis of antidepressants. *Am J Psychiatry*2007;164:1035-43.
17. Gower-Rousseau C, Salomez JL, Dupas JL, et al. Incidence of inflammatory bowel disease in northern France (1988-1990). *Gut*1994;35:1433-8.

18. [CHMP] Committee for Medicinal Products for Human Use. Guidelines on the Choice of the Noninferiority Margin.  
[http://www.ema.europa.eu/docs/en\\_GB/document\\_library/Scientific\\_guideline/2009/09/WC500003636.pdf](http://www.ema.europa.eu/docs/en_GB/document_library/Scientific_guideline/2009/09/WC500003636.pdf). (accessed 2019 Feb 12).
19. [FDA] Food and Drug Administration Center for Drug evaluation and Research (CDER) Center for Biologics Evaluation and Research (CBER). Guidance for industry, non-inferiority clinical trials to establish effectiveness.  
<https://www.fda.gov/downloads/drugs/guidancecomplianceregulatoryinformation/guidances/ucm202140.pdf>. (accessed 2019 February 12).
20. Weinblatt ME, Schiff M, Valente R, et al. Head-to-head comparison of subcutaneous abatacept versus adalimumab for rheumatoid arthritis: findings of a phase IIIb, multinational, prospective, randomized study. *Arthritis Rheum*2013;65:28-38.
21. Mease PJ, Gladman DD, Ritchlin CT, et al. Adalimumab for the treatment of patients with moderately to severely active psoriatic arthritis: results of a double-blind, randomized, placebo-controlled trial. *Arthritis Rheum*2005;52:3279-89.
22. Mease PJ, van der Heijde D, Ritchlin CT, et al. Ixekizumab, an interleukin-17A specific monoclonal antibody, for the treatment of biologic-naive patients with active psoriatic arthritis: results from the 24-week randomised, double-blind, placebo-controlled and active (adalimumab)-controlled period of the phase III trial SPIRIT-P1. *Ann Rheum Dis*2017;76:79-87.

## SUPPLEMENTARY TABLES

| <b>Online supplementary Table S1. Simultaneous achievement of ACR50 and PASI100 at week 24 as determined by primary, sensitivity, and additional analysis methodology (NRI)</b> |                               |                                |                                        |                                 |
|---------------------------------------------------------------------------------------------------------------------------------------------------------------------------------|-------------------------------|--------------------------------|----------------------------------------|---------------------------------|
|                                                                                                                                                                                 | <b>ADA<br/>(N=283)</b>        | <b>IXE<br/>(N=283)</b>         | <b>Treatment difference<br/>95% CI</b> | <b>p-value<br/>(IXE vs ADA)</b> |
| Primary analysis <sup>a</sup>                                                                                                                                                   | 79/283 (28)<br>22.7% to 33.1% | 102/283 (36)<br>30.4% to 41.6% | 8.1%<br>0.5% to 15.8%                  | 0.036                           |
| Sensitivity analysis 1 <sup>b</sup>                                                                                                                                             | 79/283 (28)<br>22.7% to 33.1% | 102/283 (36)<br>30.4% to 41.6% | 8.1%<br>0.5% to 15.8%                  | 0.036                           |
| Sensitivity analysis 2 <sup>c</sup>                                                                                                                                             | 78/280 (28)<br>22.6% to 33.1% | 99/277 (36)<br>30.1% to 41.4%  | 7.9%<br>0.2% to 15.6%                  | 0.043                           |
| Additional analysis <sup>d</sup>                                                                                                                                                | 78/283 (28)<br>22.4% to 32.8% | 99/283 (35)<br>29.4% to 40.5%  | 7.4%<br>-0.2% to 15.0%                 | 0.054                           |

ACR, American College of Rheumatology; ADA, adalimumab; BSA, body surface area; CI: confidence interval; IXE, ixekizumab; NRI, nonresponder imputation; PASI, Psoriasis Area and Severity Index.

Values presented as n/N (%), 95% CIs.

<sup>a</sup>A patient with baseline PASI=0 and baseline BSA  $\geq$ 3% was considered a postbaseline PASI100 responder if, and only if, PASI=0 and BSA=0 at the same post-baseline visit. PASI100 responders are also considered responders to PASI75 and 90.

<sup>b</sup>Regardless of the BSA outcome, any patient with baseline PASI=0 and post-baseline PASI=0 was considered a PASI100 responder. If a patient with baseline PASI=0 had a postbaseline PASI >0, the patient was considered a nonresponder for that specific post-baseline visit.

<sup>c</sup>Regardless if data were available, any patient with baseline PASI=0 was excluded from the analysis.

<sup>d</sup>Regardless of the postbaseline outcome, any patient with baseline PASI=0 was considered a nonresponder.

| Online supplementary Table S2. Summary of outcome measures. |                                                                                                                                                                                                                                                                                                                                                                                                                                                                                                                                                                                                                                                      |
|-------------------------------------------------------------|------------------------------------------------------------------------------------------------------------------------------------------------------------------------------------------------------------------------------------------------------------------------------------------------------------------------------------------------------------------------------------------------------------------------------------------------------------------------------------------------------------------------------------------------------------------------------------------------------------------------------------------------------|
| Outcome measure                                             | Description                                                                                                                                                                                                                                                                                                                                                                                                                                                                                                                                                                                                                                          |
| ACR50 + PASI100                                             | The proportion of patients simultaneously achieving ACR50 and PASI100.                                                                                                                                                                                                                                                                                                                                                                                                                                                                                                                                                                               |
| ACR20/50/70                                                 | Improvement from baseline of $\geq 20\%$ , $\geq 50\%$ , or $\geq 70\%$ in TJC, SJC, and at least 3 of the 5 ACR Core Set criteria                                                                                                                                                                                                                                                                                                                                                                                                                                                                                                                   |
| TJC                                                         | The number of tender and painful joints, determined by physical examination of 68 joints.                                                                                                                                                                                                                                                                                                                                                                                                                                                                                                                                                            |
| SJC                                                         | The number of swollen joints determined by physical examination of 66 joints.                                                                                                                                                                                                                                                                                                                                                                                                                                                                                                                                                                        |
| ACR core set criteria                                       |                                                                                                                                                                                                                                                                                                                                                                                                                                                                                                                                                                                                                                                      |
| Patient pain VAS,                                           | A patient-reported assessment of joint pain by marking a vertical tick on a 100-mm horizontal VAS where the left end represents no joint pain and the right end represents worst possible joint pain.                                                                                                                                                                                                                                                                                                                                                                                                                                                |
| PatGA VAS                                                   | A patient reported assessment of PsA activity by marking a vertical tick on a 100-mm horizontal VAS. Patients were asked, "Considering all the ways your PsA has affected you, how do you feel your PsA is today?" where the left end represents "very well" and the right end represents "very poor."                                                                                                                                                                                                                                                                                                                                               |
| PGA VAS                                                     | A physician-reported assessment where the investigator is asked to give an overall assessment of the severity of the patient's current PsA activity using a 100-mm horizontal VAS, where 0 represents no disease activity and 100 represents extremely active disease.                                                                                                                                                                                                                                                                                                                                                                               |
| HAQ-DI                                                      | A patient-reported questionnaire to measure disease-associated disability (assessment of physical function). It consists of 24 questions referring to 8 domains: dressing/grooming, arising, eating, walking, hygiene, reach, grip, and other daily activities. The disability section scores the degree of difficulty (0=without any difficulty, 1=with some difficulty, 2=with much difficulty, and 3=unable to do), covering the 8 domains. Scores for each of the functional domains are averaged to calculate the functional disability index. A minimally clinically important difference is estimated to be about 0.35 for patients with PsA. |
| CRP                                                         | A measure of acute-phase reactant measured in mg/L                                                                                                                                                                                                                                                                                                                                                                                                                                                                                                                                                                                                   |
| PASI                                                        | An assessment of psoriasis severity that combines the extent of BSA involvement in 4 anatomical regions (head, trunk, arms, and legs) and the severity of desquamation                                                                                                                                                                                                                                                                                                                                                                                                                                                                               |

|                         |                                                                                                                                                                                                                                                                                                                                                                                                                                                                                                                                                                                                                                                                           |
|-------------------------|---------------------------------------------------------------------------------------------------------------------------------------------------------------------------------------------------------------------------------------------------------------------------------------------------------------------------------------------------------------------------------------------------------------------------------------------------------------------------------------------------------------------------------------------------------------------------------------------------------------------------------------------------------------------------|
|                         | (scaling), erythema, and plaque induration/infiltration (thickness) in each region, yielding an overall score from 0 for no psoriasis up to 72 for the most severe disease. PASI75, 90, or 100 are defined an improvement from baseline of $\geq 75\%$ , 90%, or 100%, respectively.                                                                                                                                                                                                                                                                                                                                                                                      |
| MDA and VLDA            | Achievement of either 5 (MDA) or 7 (VLDA) of the 7 MDA components including TJC $\leq 1$ ; SJC $\leq 1$ ; PASI total score $\leq 1$ or BSA $\leq 3$ ; patient pain VAS score $\leq 15$ ; PatGA VAS score $\leq 20$ ; HAQ-DI score $\leq 0.5$ ; and tender enthesal points $\leq 1$                                                                                                                                                                                                                                                                                                                                                                                        |
| DAPSA                   | A composite measure that includes TJC and SJC, PatGA VAS, patient pain VAS, and CRP. Higher scores reflect more severe disease activity. DAPSA remission: $\leq 4$ . DAPSA low disease activity or remission: $\leq 14$ .                                                                                                                                                                                                                                                                                                                                                                                                                                                 |
| PASDAS                  | A weighted index comprising assessments of joints, function, acute phase response, quality of life, PGA VAS, and PatGA VAS. The score range of the PASDAS is 0 to 10, with worse disease activity represented by higher scores. PASDAS low disease activity: $\leq 3.2$ . PASDAS near remission: $\leq 1.9$ .                                                                                                                                                                                                                                                                                                                                                             |
| mCPDAI                  | A composite measure that assesses individual domains and global effect of PsA. Domains include peripheral arthritis, skin, enthesitis, and dactylitis. Scores range from 0 to 12, with a higher score indicating higher disease activity.                                                                                                                                                                                                                                                                                                                                                                                                                                 |
| SPARCC Enthesitis index | An evaluation of tenderness in 16 enthesitis sites, quantified on a dichotomous basis (0=nontender and 1=tender). The results from each site are added to produce a total score (range 0 to 16).                                                                                                                                                                                                                                                                                                                                                                                                                                                                          |
| LEI                     | A measure of enthesitis assessed at 6 sites, assigned a score of 0 (absent) or 1 (present). The results from each site were then added to produce a total score (range 0 to 6).                                                                                                                                                                                                                                                                                                                                                                                                                                                                                           |
| LDI-B                   | For each digit with dactylitis, the ratio of the circumference of the affected digit to the circumference of the digit on the opposite hand or foot is measured. If the same digits on each hand or foot are thought to be involved, the clinician refers to a table of normative values for a value that would be used to provide the comparison. If the ratio is $>1.1$ , then 1 is subtracted from the calculated ratio and multiplied by 100 and the tenderness score of 0 (not tender) or 1 (tender). If the ratio of the circumference of the digit is $\leq 1.1$ , then the LDI-B score is set to 0. The results of each digit are added to produce a total score. |
| NAPSI fingernails       | An assessment of fingernail psoriasis severity where the fingernail is divided with imaginary horizontal and longitudinal lines into quadrants. Each fingernail is given a score for nail bed psoriasis (0 to 4) and nail matrix psoriasis (0 to 4) depending on the presence (1) or absence (0) of any of the features of nail psoriasis in each quadrant. The NAPSI fingernails score of a nail is the sum of scores in nail bed and                                                                                                                                                                                                                                    |

|                                                                                                                                                                                                                                                                                                                                                                                                                                                                                                                                                                                                                                                                                                                                                                                                                                                                                                                       |                                                                                                                                                                                                                                                                                                                                                                                                                                                            |
|-----------------------------------------------------------------------------------------------------------------------------------------------------------------------------------------------------------------------------------------------------------------------------------------------------------------------------------------------------------------------------------------------------------------------------------------------------------------------------------------------------------------------------------------------------------------------------------------------------------------------------------------------------------------------------------------------------------------------------------------------------------------------------------------------------------------------------------------------------------------------------------------------------------------------|------------------------------------------------------------------------------------------------------------------------------------------------------------------------------------------------------------------------------------------------------------------------------------------------------------------------------------------------------------------------------------------------------------------------------------------------------------|
|                                                                                                                                                                                                                                                                                                                                                                                                                                                                                                                                                                                                                                                                                                                                                                                                                                                                                                                       | nail matrix from each quadrant (thus a maximum of 8). The total score is the sum of scores for each fingernail (range of 0 to 80).                                                                                                                                                                                                                                                                                                                         |
| DLQI                                                                                                                                                                                                                                                                                                                                                                                                                                                                                                                                                                                                                                                                                                                                                                                                                                                                                                                  | A patient-administered, 10-question, validated, quality-of-life questionnaire that covers 6 domains: symptoms and feelings, daily activities, leisure, work and school, personal relationships, and treatment. Response categories include “not at all,” “a little,” “a lot,” and “very much,” with corresponding scores of 0, 1, 2, and 3, respectively, and “not relevant” responses scored as “0.” Totals range from 0 to 30 (less to more impairment). |
| sPGA                                                                                                                                                                                                                                                                                                                                                                                                                                                                                                                                                                                                                                                                                                                                                                                                                                                                                                                  | A measure of overall psoriasis severity. Lesions are categorized by descriptions for induration, erythema, and scaling. The patient’s psoriasis is assessed at a given time point on a 6-point scale in which 0=cleared, 1=minimal, 2=mild, 3=moderate, 4=severe, and 5=very severe.                                                                                                                                                                       |
| % BSA                                                                                                                                                                                                                                                                                                                                                                                                                                                                                                                                                                                                                                                                                                                                                                                                                                                                                                                 | A measure of psoriasis body surface area involvement conducted on a continuous scale from 0% to 100%, in which 1% corresponds to the size of the patients hand (including palm, fingers, and thumb).                                                                                                                                                                                                                                                       |
| <p>ACR, American College of Rheumatology; BSA, body surface area; CRP, C-reactive protein; DAPSA, Disease Activity in Psoriatic Arthritis; DLQI, Dermatology Life Quality Index; HAQ-DI, Health Assessment Questionnaire–Disability Index; LDI-B, Leeds Dactylitis Index–Basic; LEI, Leeds Enthesitis Index; mCPDAI, modified Composite Psoriatic Disease Activity Index; MDA, minimal disease activity; NAPSI, Nail Psoriasis Area and Severity Index; PASDAS, psoriatic arthritis disease activity score; PASI, Psoriasis Area and Severity Index; PatGA, patient’s global assessment of disease activity; PGA, physician’s global assessment of disease activity; PsA, psoriatic arthritis; SJC, swollen joint count; SPARCC, Spondyloarthritis Research Consortium of Canada; sPGA, static physician’s global assessment; TJC, tender joint count, VAS, visual analog scale; VLDA, very low disease activity.</p> |                                                                                                                                                                                                                                                                                                                                                                                                                                                            |

| <b>Online supplementary Table 3. List of serious infections</b> |                          |
|-----------------------------------------------------------------|--------------------------|
| <b>ADA</b>                                                      | <b>IXE</b>               |
| <b>N=283</b>                                                    | <b>N=283</b>             |
| Appendicitis, n=1                                               | Appendicitis, n=1        |
| Cellulitis, n=1                                                 | Cellulitis, n=1          |
| Abscess, n=1                                                    | Arthritis bacterial, n=1 |
| Lower respiratory tract infection, n=1                          | Infections colitis, n=1  |

|                                   |  |
|-----------------------------------|--|
| Lymph node tuberculosis, n=1      |  |
| Meningitis viral, n=1             |  |
| Pneumonia legionella, n=1         |  |
| Pyelonephritis, n=1               |  |
| Sepsis, n=1                       |  |
| ADA, adalimumab; IXE, ixekizumab. |  |
